# Supplementary material for: Non-steroidal anti-inflammatory drug-induced anaphylaxis infrequent in 388 patients with mastocytosis: A two-center retrospective cohort study
Source: PubMed Central journal article supplement (PMC9760711; doi:10.3389/falgy.2022.1071807), 2022-12-05
Supplement: Table1.pdf [file Table1.pdf]

Supplementary Table S1: Clinical characteristics of mastocytosis patients (n=34) who underwent drug provocation tests

| NSAID Culprit | Diagnosis | Age at Diagnosis, Gender | Reaction pattern                            | DPT        | Reaction |
|---------------|-----------|--------------------------|---------------------------------------------|------------|----------|
| 1. None       | ISM       | 45, F                    | None. Reluctant to use NSAID due to anxiety | Nimesulide | None     |
| 2. None       | ISM       | 59, M                    | None. Reluctant to use NSAID due to anxiety | Nimesulide | None     |
| 3. None       | ISM       | 52, F                    | None. Reluctant to use NSAID due to anxiety | Nimesulide | None     |
| 4. None       | ISM       | 42, F                    | None. Reluctant to use NSAID due to anxiety | Nimesulide | None     |
| 5. None       | MMAS      | 58, F                    | None. Reluctant to use NSAID due to anxiety | Nimesulide | None     |
| 6. Naproxen   | ISM       | 50, M                    | Urticaria                                   | Nimesulide | None     |
| 7. None       | MMAS      | 62, M                    | None. Reluctant to use NSAID due to anxiety | Nimesulide | None     |
| 8. None       | ISM       | 40, F                    | None. Reluctant to use NSAID due to anxiety | Nimesulide | None     |
| 9. None       | ISM       | 66, F                    | None. Reluctant to use NSAID due to anxiety | Nimesulide | None     |
| 10. None      | ASM       | 47, F                    | None. Reluctant to use NSAID due to anxiety | Nimesulide | None     |
| 11. None      | MMAS      | 40, F                    | None. Reluctant to use NSAID due to anxiety | Nimesulide | None     |
| 12. None      | MMAS      | 65, F                    | None. Reluctant to use NSAID due to anxiety | Nimesulide | None     |
| 13. None      | ISM       | 22, F                    | None. Reluctant to use NSAID due to anxiety | Nimesulide | None     |
| 14. None      | ISM       | 25, M                    | None. Reluctant to use NSAID due to anxiety | Nimesulide | None     |
| 15. None      | ISM       | 37, F                    | None. Reluctant to use NSAID due to anxiety | Nimesulide | None     |
| 16. None      | ISM       | 37, M                    | None. Reluctant to use NSAID due to anxiety | Nimesulide | None     |
| 17. None      | ISM       | 63, F                    | None. Reluctant to use NSAID due to anxiety | Nimesulide | None     |
| 18. None      | ISM       | 56, M                    | None. Reluctant to use NSAID due to anxiety | Nimesulide | None     |
| 19. None      | ISM       | 61, F                    | None. Reluctant to use NSAID due to anxiety | Nimesulide | None     |
| 20. None      | ISM       | 41, F                    | None. Reluctant to use NSAID due to anxiety | Nimesulide | None     |
| 21. None      | ISM       | 67, F                    | None. Reluctant to use NSAID due to anxiety | Nimesulide | None     |
| 22. None      | ISM       | 70, F                    | None. Reluctant to use NSAID due to anxiety | Nimesulide | None     |
| 23. None      | ISM       | 55, F                    | None. Reluctant to use NSAID due to anxiety | Nimesulide | None     |

|                       |         |       |                                               |            |      |
|-----------------------|---------|-------|-----------------------------------------------|------------|------|
| <b>24. None</b>       | ISM     | 35, F | None. Reluctant to use NSAID due to anxiety   | Nimesulide | None |
| <b>25. None</b>       | ISM     | 49, M | None. Reluctant to use NSAID due to anxiety   | Nimesulide | None |
| <b>26. ASA</b>        | ISM     | 56, F | Urticaria                                     | Nimesulide | None |
| <b>27. ASA</b>        | MMAS    | 48, F | Urticaria, angioedema                         | Nimesulide | None |
| <b>28. ASA</b>        | SSM     | 80, F | Urticaria                                     | Nimesulide | None |
| <b>29. ASA</b>        | ISM     | 49, F | Palpitation, vertigo                          | Nimesulide | None |
| <b>30. Diclofenac</b> | MMAS    | 56, M | Anaphylaxis (dyspnea, urticaria, hypotension) | Nimesulide | None |
| <b>31. Ketoprofen</b> | MIS     | 58, F | Angioedema                                    | Nimesulide | None |
| <b>32. ASA</b>        | ISM-AHN | 59, M | Urticaria, flushing                           | Nimesulide | None |
| <b>33. Ibuprofen</b>  | ISM     | 51, M | Pruritus, flushing                            | Ibuprofen  | None |
| <b>34. Ibuprofen</b>  | ISM     | 53, M | Exantema                                      | Ibuprofen  | None |

Abbreviations: NSAID, non-steroidal anti-inflammatory drug; DPT, drug provocation test; ISM, indolent systemic mastocytosis; ISM-AHN, indolent systemic mastocytosis with an associated hematologic neoplasm; MIS, mastocytosis in the skin; MMAS, monoclonal mast cell activation syndrome; F, female; M, male.
